# Supplementary material for: Association of Blood Biomarkers With Acute Sport-Related Concussion in Collegiate Athletes: Findings From the NCAA and Department of Defense CARE Consortium
Source: PubMed Central journal article supplement (PMC6991302; doi:10.1001/jamanetworkopen.2019.19771), 2020-01-24
Supplement: jamanetwopen-3-e1919771-s001.pdf [file jamanetwopen-3-e1919771-s001.pdf]

## Supplementary Online Content

McCrea M, Broglio SP, McAllister TW, et al; CARE Consortium Investigators. Association of blood biomarkers with acute sport-related concussion in collegiate athletes: findings from the NCAA and Department of Defense CARE Consortium. *JAMA Netw Open*. 2020;3(1):e1919771. doi:10.1001/jamanetworkopen.2019.19771

**eFigure.** Baseline and Postinjury SCAT, BESS, SAC and BSI-18 Data for Concussed, Contact Control, and Non-Contact Control Athletes

**eTable 1.** Clinical Outcome Assessment Characteristics for Concussed, Contact Control and Non-Contact Control Athletes at Baseline, Acute Post-Injury, and 24-48 Hours Post-Injury Time Points

**eTable 2.** Within-Subjects Comparisons of Clinical Outcome Assessments

**eTable 3.** Between-Subjects Comparisons of Clinical Outcome Assessments

**eTable 4.** Biomarker Characteristics for Concussed, Contact Control, and Non-Contact Control Athletes at All Time Points

**eTable 5.** Within-Subjects Comparisons of Biomarkers in Concussed Athletes

**eTable 6.** Between-Subjects Comparisons of Biomarkers in Concussed, Contact Control, and Non-Contact Control Athletes

**eTable 7.** Area Under the Curve (AUC) Summaries for Biomarkers SAC and BESS at Acute Post-Injury and 24-48 Hours Post-Injury Time Points

**eTable 8.** Biomarker Characteristics for Concussed Athletes With or Without Loss of Consciousness or Post-Traumatic Amnesia at All Time Points

**eTable 9.** Within-Subjects Comparisons of Biomarkers in Athletes With or Without Loss of Consciousness or Post-Traumatic Amnesia

**eTable 10.** Between-Subjects Comparisons of Biomarkers in Athletes With or Without Loss of Consciousness or Post-Traumatic Amnesia, Contact Control, and Non-Contact Control Athletes

**eTable 11.** Subgroup Area Under the Curve (AUC) for Biomarkers SAC and BESS at Acute Post-Injury and 24-48 Hours Post-Injury Time Points

This supplementary material has been provided by the authors to give readers additional information about their work.

**eFigure.** Baseline and Postinjury SCAT, BESS, SAC and BSI-18 Data for Concussed, Contact Control, and Non-Contact Control Athletes

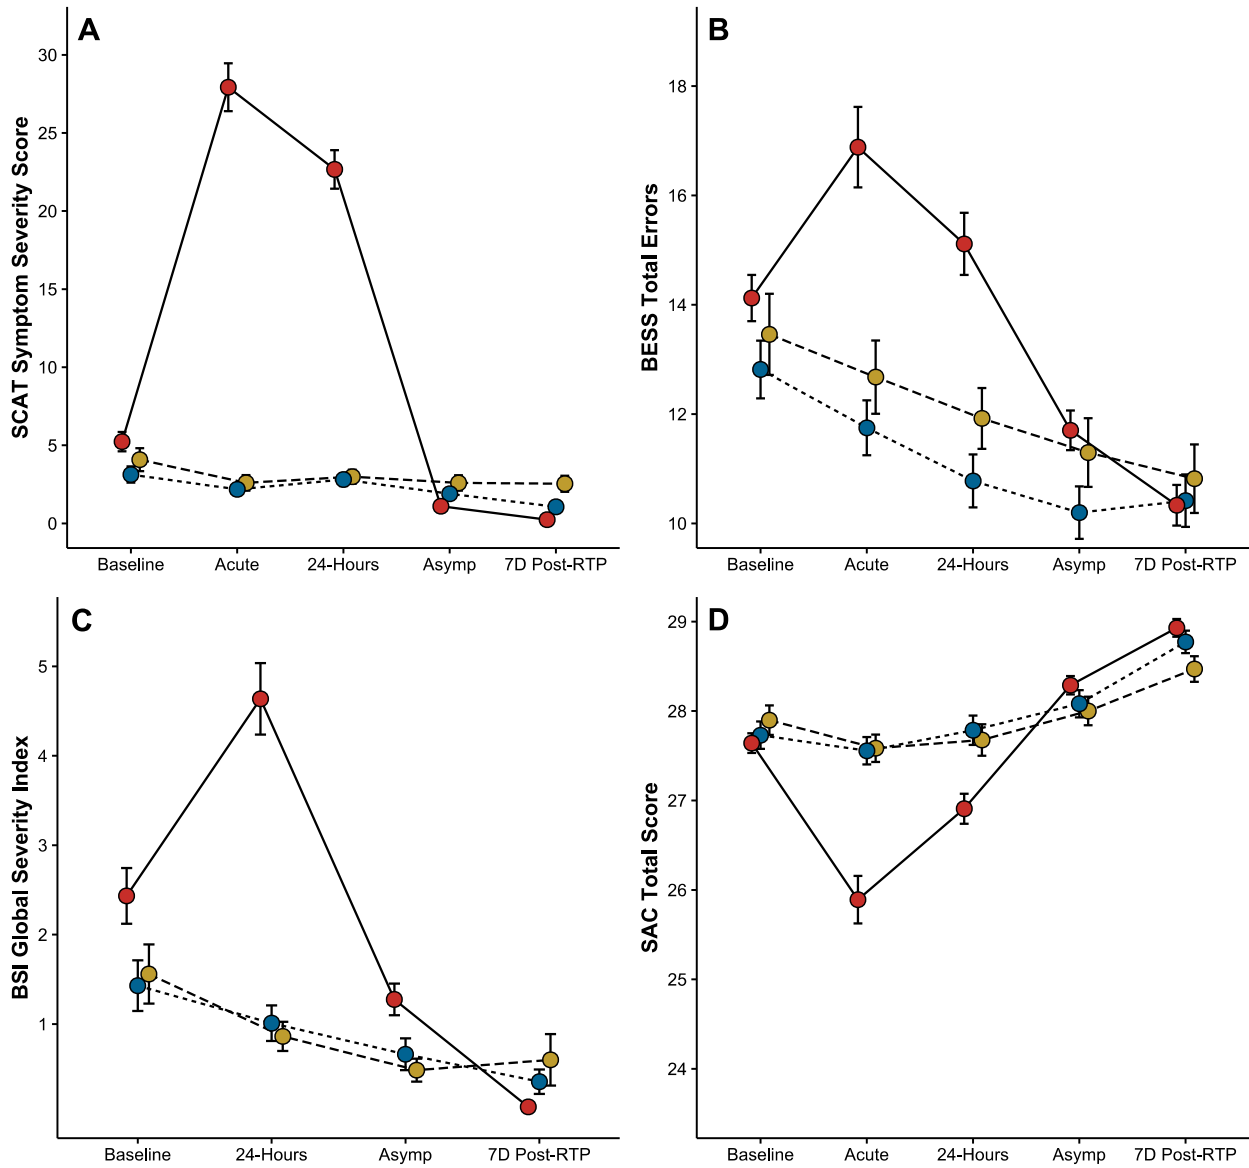

SCAT=Sport Concussion Assessment Tool; BESS=Balance Error Scoring System; BSI=Brief Symptom Inventory-18; SAC=Standardized Assessment of Concussion; Asymp=point at which athlete asymptomatic and return to play protocol initiated; 7D Post-RTP=7 days after unrestricted return to play; for SCAT, BESS and BSI, higher score is worse; for SAC, lower score is worse.

Error bars represent +/- one standard error

**eTable 1.** Clinical Outcome Assessment Characteristics for Concussed, Contact Control and Non-Contact Control Athletes at Baseline, Acute Post-Injury, and 24-48 Hours Post-Injury Time Points

|                         |        | Concussed |       |       | Contact Control |       |      | Non-Contact Control |       |      |
|-------------------------|--------|-----------|-------|-------|-----------------|-------|------|---------------------|-------|------|
|                         |        | n         | Mean  | SD    | n               | Mean  | SD   | n                   | Mean  | SD   |
| Baseline                | SCAT   | 258       | 5.24  | 9.93  | 135             | 3.13  | 6.03 | 102                 | 4.08  | 7.45 |
|                         | SAC    | 251       | 27.64 | 1.73  | 137             | 27.73 | 1.79 | 98                  | 27.90 | 1.63 |
|                         | BESS   | 251       | 14.12 | 6.69  | 136             | 12.82 | 6.16 | 96                  | 13.46 | 7.27 |
|                         | BSI-18 | 254       | 2.43  | 4.97  | 135             | 1.43  | 3.29 | 100                 | 1.56  | 3.31 |
| Acute Post-injury       | SCAT   | 181       | 27.93 | 20.60 | 135             | 2.18  | 3.81 | 101                 | 2.59  | 5.03 |
|                         | SAC    | 175       | 25.89 | 3.51  | 135             | 27.56 | 1.78 | 101                 | 27.58 | 1.54 |
|                         | BESS   | 145       | 16.88 | 8.87  | 135             | 11.75 | 5.84 | 102                 | 12.68 | 6.77 |
| 24-48 Hours Post-injury | SCAT   | 224       | 10.39 | 5.82  | 135             | 1.93  | 3.18 | 101                 | 2.10  | 2.73 |
|                         | SAC    | 224       | 22.67 | 18.42 | 135             | 2.81  | 4.79 | 101                 | 2.99  | 4.52 |
|                         | BESS   | 216       | 26.91 | 2.47  | 135             | 27.79 | 1.91 | 102                 | 27.68 | 1.78 |
|                         | BSI-18 | 209       | 4.64  | 5.78  | 135             | 1.01  | 2.30 | 102                 | 0.86  | 1.65 |
| Asymptomatic            | SCAT   | 246       | 1.10  | 2.58  | 133             | 1.89  | 3.65 | 98                  | 2.59  | 4.87 |
|                         | SAC    | 239       | 28.29 | 1.58  | 134             | 28.08 | 1.76 | 99                  | 28.00 | 1.58 |
|                         | BESS   | 239       | 11.70 | 5.62  | 132             | 10.20 | 5.51 | 98                  | 11.30 | 6.22 |
|                         | BSI-18 | 240       | 1.28  | 2.74  | 134             | 0.66  | 2.05 | 99                  | 0.48  | 1.28 |
| 7 Days Post-RTP         | SCAT   | 201       | 0.24  | 1.17  | 131             | 1.06  | 2.27 | 100                 | 2.54  | 5.14 |
|                         | SAC    | 199       | 28.93 | 1.39  | 132             | 28.77 | 1.44 | 100                 | 28.47 | 1.43 |
|                         | BESS   | 196       | 10.33 | 5.21  | 130             | 10.42 | 5.47 | 99                  | 10.82 | 6.24 |
|                         | BSI-18 | 201       | 0.07  | 0.40  | 132             | 0.36  | 1.57 | 100                 | 0.60  | 2.88 |

SCAT, Sport Concussion Assessment Tool; SAC, Standardized Assessment of Concussion; BESS, Balance Error Scoring System; BSI-18, Brief Symptom Inventory

Clinical outcome assessments: SCAT symptom severity score, SAC total score, BESS total errors, and BSI-18 Global Severity Index  
BSI-18 was not administered at the acute post-injury time point.

**eTable 2.** Within-Subjects Comparisons of Clinical Outcome Assessments

|                              | Time point Comparison       | Concussed               |         | Contact Control |        | Non-Contact Control |        |       |
|------------------------------|-----------------------------|-------------------------|---------|-----------------|--------|---------------------|--------|-------|
|                              |                             | Mean Difference         | P       | Mean Difference | P      | Mean Difference     | P      |       |
| SCAT Symptom Severity Score  | Baseline vs.                | Acute Post-Injury       | -22.854 | <.001           | NS     |                     | NS     |       |
|                              |                             | 24-48 Hours Post-Injury | -17.073 | <.001           |        |                     |        |       |
|                              |                             | Asymptomatic            | 4.178   | <.001           |        |                     |        |       |
|                              |                             | 7 Days Post-RTP         | 4.693   | <.001           |        |                     |        |       |
|                              | Acute Post-Injury vs.       | 24-48 Hours Post-Injury | 5.781   | <.001           |        |                     |        |       |
|                              |                             | Asymptomatic            | 27.031  | <.001           |        |                     |        |       |
|                              |                             | 7 Days Post-RTP         | 27.547  | <.001           |        |                     |        |       |
|                              | 24-48 Hours Post-Injury vs. | Asymptomatic            | 21.251  | <.001           |        |                     |        |       |
|                              |                             | 7 Days Post-RTP         | 21.766  | <.001           |        |                     |        |       |
|                              | Asymptomatic vs.            | 7 Days Post-RTP         | 0.516   | >.999           |        |                     |        |       |
| SAC Total Score              | Baseline vs.                | Acute Post-Injury       | 1.759   | <.001           | 0.190  | >.999               | 0.311  | >.999 |
|                              |                             | 24-48 Hours Post-Injury | 0.697   | <.001           | -0.071 | >.999               | 0.204  | >.999 |
|                              |                             | Asymptomatic            | -0.617  | <.001           | -0.347 | .676                | -0.108 | >.999 |
|                              |                             | 7 Days Post-RTP         | -1.133  | <.001           | -1.018 | <.001               | -0.583 | .087  |
|                              | Acute Post-Injury vs.       | 24-48 Hours Post-Injury | -1.062  | <.001           | -0.261 | >.999               | -0.107 | >.999 |
|                              |                             | Asymptomatic            | -2.376  | <.001           | -0.537 | .048                | -0.419 | .576  |
|                              |                             | 7 Days Post-RTP         | -2.892  | <.001           | -1.208 | <.001               | -0.894 | .001  |
|                              | 24-48 Hours Post-Injury vs. | Asymptomatic            | -1.314  | <.001           | -0.276 | >.999               | -0.312 | >.999 |
|                              |                             | 7 Days Post-RTP         | -1.830  | <.001           | -0.947 | <.001               | -0.787 | .003  |
|                              | Asymptomatic vs.            | 7 Days Post-RTP         | -0.516  | .007            | -0.671 | .005                | -0.475 | .319  |
| BESS Total Errors            | Baseline vs.                | Acute Post-Injury       | -3.177  | <.001           | 1.147  | .366                | 0.754  | >.999 |
|                              |                             | 24-48 Hours Post-Injury | -0.909  | .334            | 2.111  | .001                | 1.512  | .190  |
|                              |                             | Asymptomatic            | 2.423   | <.001           | 2.690  | <.001               | 2.160  | .009  |
|                              |                             | 7 Days Post-RTP         | 3.184   | <.001           | 2.452  | <.001               | 2.594  | .001  |
|                              | Acute Post-Injury vs.       | 24-48 Hours Post-Injury | 2.268   | <.001           | 0.964  | .800                | 0.758  | >.999 |
|                              |                             | Asymptomatic            | 5.600   | <.001           | 1.542  | .053                | 1.406  | .277  |
|                              |                             | 7 Days Post-RTP         | 6.361   | <.001           | 1.305  | .188                | 1.841  | .039  |
|                              | 24-48 Hours Post-Injury vs. | Asymptomatic            | 3.332   | <.001           | 0.578  | >.999               | 0.648  | >.999 |
|                              |                             | 7 Days Post-RTP         | 4.093   | <.001           | 0.341  | >.999               | 1.082  | .900  |
|                              | Asymptomatic vs.            | 7 Days Post-RTP         | 0.761   | .865            | -0.237 | >.999               | 0.434  | >.999 |
| BSI-18 Global Severity Index | Baseline vs.                | 24-48 Hours Post-Injury | -2.174  | <.001           | 0.397  | >.999               | NS     |       |
|                              |                             | Asymptomatic            | 1.135   | <.001           | 0.769  | .260                |        |       |
|                              |                             | 7 Days Post-RTP         | 2.333   | <.001           | 1.077  | .029                |        |       |
|                              | 24-48 Hours Post-Injury vs. | Asymptomatic            | 3.309   | <.001           | 0.372  | >.999               |        |       |
|                              |                             | 7 Days Post-RTP         | 4.506   | <.001           | 0.680  | .452                |        |       |
|                              | Asymptomatic vs.            | 7 Days Post-RTP         | 1.197   | <.001           | 0.308  | >.999               |        |       |

SCAT, Sport Concussion Assessment Tool; SAC, Standardized Assessment of Concussion; BESS, Balance Error Scoring System; BSI-18, Brief Symptom Inventory; NS, Non-significant simple main effect.

Results are reported only for comparisons with significant simple main effects. BSI-18 was not administered at the acute post-injury time point. All P-values are corrected for multiple comparisons (Bonferroni).

**eTable 3.** Between-Subjects Comparisons of Clinical Outcome Assessments

|        | Group Comparison    |                     | Baseline        |             | Acute Post-Injury |                 | 24-48 Hours Post-Injury |                 |
|--------|---------------------|---------------------|-----------------|-------------|-------------------|-----------------|-------------------------|-----------------|
|        |                     |                     | Mean Difference | <i>P</i>    | Mean Difference   | <i>P</i>        | Mean Difference         | <i>P</i>        |
| SCAT   | Concussed vs.       | Contact Control     | NS              |             | 25.969            | <b>&lt;.001</b> | 19.568                  | <b>&lt;.001</b> |
|        |                     | Non-Contact Control |                 |             | 25.597            |                 | 19.359                  |                 |
|        | Contact Control vs. | Non-Contact Control |                 |             | -0.372            | >.999           | -0.210                  | >.999           |
| SAC    | Concussed vs.       | Contact Control     | NS              |             | -1.643            | <b>&lt;.001</b> | -0.843                  | <b>&lt;.001</b> |
|        |                     | Non-Contact Control |                 |             | -1.669            |                 | -0.715                  |                 |
|        | Contact Control vs. | Non-Contact Control |                 |             | -0.026            | >.999           | 0.128                   | >.999           |
| BESS   | Concussed vs.       | Contact Control     | NS              |             | 5.633             | <b>&lt;.001</b> | 4.329                   | <b>&lt;.001</b> |
|        |                     | Non-Contact Control |                 |             | 4.655             |                 | 3.145                   |                 |
|        | Contact Control vs. | Non-Contact Control |                 |             | -0.978            | .752            | -1.184                  | .496            |
| BSI-18 | Concussed vs.       | Contact Control     | 1.009           | <b>.014</b> | .                 | .               | 3.581                   | <b>&lt;.001</b> |
|        |                     | Non-Contact Control | 0.878           | <b>.078</b> | .                 | .               | 3.746                   |                 |
|        | Contact Control vs. | Non-Contact Control | -0.132          | >.999       | .                 | .               | 0.166                   | >.999           |

SCAT, Sport Concussion Assessment Tool; SAC, Standardized Assessment of Concussion; BESS, Balance Error Scoring System; BSI-18, Brief Symptom Inventory; NS, Non-significant simple main effect.

Results are reported only for comparisons with significant simple main effects. BSI-18 was not administered at the acute post-injury time point. All *P*-values are corrected for multiple comparisons (Bonferroni).

**eTable 4. Biomarker Characteristics for Concussed, Contact Control, and Non-Contact Control Athletes at All Time Points**

|                         |        | Concussed |        |        |        |                | Contact Control |       |        |        |               | Non-Contact Control |       |       |        |               |
|-------------------------|--------|-----------|--------|--------|--------|----------------|-----------------|-------|--------|--------|---------------|---------------------|-------|-------|--------|---------------|
|                         |        | n         | Mean   | SD     | Median | IQR            | n               | Mean  | SD     | Median | IQR           | n                   | Mean  | SD    | Median | IQR           |
| Baseline                | GFAP   | 243       | 61.81  | 24.94  | 57.38  | [44.11-75.43]  | 135             | 75.05 | 189.26 | 56.27  | [43.93-68.70] | .                   | .     | .     | .      | .             |
|                         | UCH-L1 | 194       | 18.88  | 25.89  | 11.02  | [5.28-26.76]   | 112             | 40.07 | 220.68 | 11.30  | [6.50-22.72]  | .                   | .     | .     | .      | .             |
|                         | NF-L   | 243       | 6.56   | 3.32   | 5.88   | [4.45-7.75]    | 135             | 36.69 | 349.63 | 5.90   | [4.31-7.97]   | .                   | .     | .     | .      | .             |
|                         | tau    | 240       | 1.04   | 0.68   | 0.88   | [0.61-1.24]    | 130             | 1.20  | 1.32   | 0.87   | [0.59-1.43]   | .                   | .     | .     | .      | .             |
| Acute Post-injury       | GFAP   | 100       | 123.97 | 128.03 | 76.22  | [55.93-128.63] | 133             | 63.40 | 26.60  | 58.55  | [43.86-79.97] | 95                  | 69.45 | 66.78 | 61.71  | [49.21-73.80] |
|                         | UCH-L1 | 92        | 27.64  | 23.73  | 20.29  | [9.36-40.60]   | 100             | 18.00 | 27.33  | 11.31  | [4.95-23.18]  | 71                  | 17.63 | 19.48 | 12.17  | [5.44-22.82]  |
|                         | NF-L   | 100       | 7.04   | 3.31   | 6.08   | [5.10-8.50]    | 133             | 6.67  | 3.71   | 5.83   | [4.31-8.07]   | 95                  | 6.58  | 2.60  | 6.10   | [4.81-8.15]   |
|                         | tau    | 100       | 1.34   | 1.31   | 1.04   | [0.68-1.53]    | 127             | 1.12  | 0.75   | 0.93   | [0.54-1.54]   | 93                  | 0.99  | 0.63  | 0.81   | [0.55-1.27]   |
| 24-48 Hours Post-injury | GFAP   | 183       | 100.75 | 206.68 | 67.48  | [50.54-94.92]  | 132             | 65.94 | 24.51  | 60.54  | [48.39-80.19] | 98                  | 71.33 | 69.91 | 59.88  | [47.90-83.40] |
|                         | UCH-L1 | 151       | 15.83  | 16.49  | 10.65  | [5.60-20.03]   | 98              | 16.49 | 30.10  | 11.00  | [4.50-19.94]  | 76                  | 14.24 | 14.91 | 10.00  | [5.22-16.80]  |
|                         | NF-L   | 183       | 6.52   | 3.22   | 5.63   | [4.43-7.71]    | 132             | 6.83  | 4.54   | 5.65   | [4.55-8.29]   | 98                  | 6.59  | 2.71  | 6.07   | [4.58-8.05]   |
|                         | tau    | 178       | 0.78   | 0.63   | 0.63   | [0.41-0.95]    | 128             | 1.05  | 0.72   | 0.97   | [0.59-1.32]   | 98                  | 0.93  | 0.61  | 0.76   | [0.53-1.12]   |
| Asymptomatic            | GFAP   | 231       | 72.66  | 41.79  | 64.85  | [48.47-84.64]  | 130             | 64.71 | 26.17  | 58.75  | [44.62-76.58] | 98                  | 71.11 | 67.23 | 63.03  | [49.61-80.07] |
|                         | UCH-L1 | 176       | 14.43  | 22.74  | 9.36   | [3.91-17.64]   | 95              | 16.70 | 27.17  | 11.88  | [4.96-19.41]  | 76                  | 16.16 | 16.19 | 11.93  | [7.60-20.24]  |
|                         | NF-L   | 231       | 7.05   | 6.02   | 5.98   | [4.34-8.00]    | 130             | 6.67  | 3.79   | 6.01   | [4.56-7.49]   | 98                  | 6.62  | 2.63  | 6.17   | [4.68-8.10]   |
|                         | tau    | 227       | 0.97   | 0.91   | 0.76   | [0.47-1.12]    | 130             | 1.07  | 0.73   | 0.89   | [0.57-1.44]   | 94                  | 0.91  | 0.67  | 0.72   | [0.55-1.19]   |
| 7 Days Post-RTP         | GFAP   | 201       | 66.93  | 25.32  | 61.63  | [49.20-79.93]  | 127             | 63.76 | 23.07  | 58.28  | [46.11-78.16] | 95                  | 72.42 | 70.43 | 62.56  | [50.92-79.58] |
|                         | UCH-L1 | 160       | 15.59  | 14.68  | 10.75  | [5.07-22.99]   | 95              | 14.57 | 19.78  | 9.17   | [5.88-16.20]  | 73                  | 16.55 | 16.34 | 11.40  | [6.58-21.94]  |
|                         | NF-L   | 201       | 7.62   | 6.28   | 6.11   | [4.35-8.12]    | 127             | 6.69  | 3.73   | 5.85   | [4.56-7.81]   | 95                  | 6.64  | 2.83  | 6.21   | [4.48-8.15]   |
|                         | tau    | 200       | 1.28   | 2.43   | 0.91   | [0.54-1.28]    | 124             | 1.00  | 0.65   | 0.83   | [0.57-1.32]   | 92                  | 0.96  | 0.70  | 0.79   | [0.53-1.16]   |

GFAP: glial fibrillary acidic protein; UCH-L1: ubiquitin C-terminal hydrolase-L1; NF-L: neurofilament light; SD: standard deviation; IQR: interquartile range; RTP: return-to-play

Units represent pg/mL for all biomarkers. Blood was not collected from non-contact control athletes at the baseline time point.

GFAP: limit of detection (LOD) = 0.221 pg/mL, lower limit of quantification (LLOQ) = 0.467 pg/mL, upper limit of quantification (ULOQ) = 850 pg/mL; UCH-L1: LOD = 1.74 pg/mL, LLOQ = 5.45 pg/mL, ULOQ = 8855 pg/mL; NF-L: LOD = 0.104 pg/mL, LLOQ = 0.241 pg/mL, ULOQ = 429 pg/mL; tau: LOD = 0.024 pg/mL, LLOQ = 0.053 pg/mL, ULOQ = 84.9 pg/mL

**eTable 5.** Within-Subjects Comparisons of Biomarkers in Concussed Athletes

|        | Time point Comparison       | Concussed                    |          |                 |
|--------|-----------------------------|------------------------------|----------|-----------------|
|        |                             | Mean Difference <sup>a</sup> | <i>P</i> |                 |
| GFAP   | Baseline vs.                | Acute Post-Injury            | -0.430   | <b>&lt;.001</b> |
|        |                             | 24-48 Hours Post-Injury      | -0.255   | <b>&lt;.001</b> |
|        |                             | Asymptomatic                 | -0.124   | <b>&lt;.001</b> |
|        |                             | 7 Days Post-RTP              | -0.092   | <b>.002</b>     |
|        | Acute Post-Injury vs.       | 24-48 Hours Post-Injury      | 0.175    | <b>&lt;.001</b> |
|        |                             | Asymptomatic                 | 0.306    | <b>&lt;.001</b> |
|        |                             | 7 Days Post-RTP              | 0.338    | <b>&lt;.001</b> |
|        | 24-48 Hours Post-Injury vs. | Asymptomatic                 | 0.132    | <b>&lt;.001</b> |
|        |                             | 7 Days Post-RTP              | 0.164    | <b>&lt;.001</b> |
|        | Asymptomatic vs.            | 7 Days Post-RTP              | 0.032    | >.999           |
| UCH-L1 | Baseline vs.                | Acute Post-Injury            | -0.449   | <b>&lt;.001</b> |
|        |                             | 24-48 Hours Post-Injury      | 0.127    | >.999           |
|        |                             | Asymptomatic                 | 0.321    | <b>.001</b>     |
|        |                             | 7 Days Post-RTP              | 0.079    | >.999           |
|        | Acute Post-Injury vs.       | 24-48 Hours Post-Injury      | -0.576   | <b>&lt;.001</b> |
|        |                             | Asymptomatic                 | 0.194    | .245            |
|        |                             | 7 Days Post-RTP              | -0.048   | >.999           |
|        | 24-48 Hours Post-Injury vs. | Asymptomatic                 | 0.194    | .245            |
|        |                             | 7 Days Post-RTP              | -0.048   | >.999           |
|        | Asymptomatic vs.            | 7 Days Post-RTP              | -0.242   | <b>.044</b>     |
| NF-L   | Baseline vs.                | Acute Post-Injury            | -0.068   | .671            |
|        |                             | 24-48 Hours Post-Injury      | -0.019   | >.999           |
|        |                             | Asymptomatic                 | -0.019   | >.999           |
|        |                             | 7 Days Post-RTP              | -0.092   | <b>.014</b>     |
|        | Acute Post-Injury vs.       | 24-48 Hours Post-Injury      | 0.049    | >.999           |
|        |                             | Asymptomatic                 | 0.049    | >.999           |
|        |                             | 7 Days Post-RTP              | -0.024   | >.999           |
|        | 24-48 Hours Post-Injury vs. | Asymptomatic                 | 0.000    | >.999           |
|        |                             | 7 Days Post-RTP              | -0.073   | .209            |
|        | Asymptomatic vs.            | 7 Days Post-RTP              | -0.073   | .125            |
| tau    | Baseline vs.                | Acute Post-Injury            | -0.221   | <b>.004</b>     |
|        |                             | 24-48 Hours Post-Injury      | 0.320    | <b>&lt;.001</b> |
|        |                             | Asymptomatic                 | 0.184    | <b>.001</b>     |
|        |                             | 7 Days Post-RTP              | -0.017   | >.999           |
|        | Acute Post-Injury vs.       | 24-48 Hours Post-Injury      | 0.541    | <b>&lt;.001</b> |
|        |                             | Asymptomatic                 | 0.405    | <b>&lt;.001</b> |
|        |                             | 7 Days Post-RTP              | 0.204    | <b>.015</b>     |
|        | 24-48 Hours Post-Injury vs. | Asymptomatic                 | -0.136   | .079            |
|        |                             | 7 Days Post-RTP              | -0.337   | <b>&lt;.001</b> |
|        | Asymptomatic vs.            | 7 Days Post-RTP              | -0.200   | <b>&lt;.001</b> |

<sup>a</sup>Mean differences of natural log-transformed biomarker values.

Results are reported only for comparisons with significant simple main effects. All *P*-values are corrected for multiple comparisons (Bonferroni).

**eTable 6.** Between-Subjects Comparisons of Biomarkers in Concussed, Contact Control, and Non-Contact Control Athletes

|        | Group Comparison    |                     | Acute Post-Injury            |                 | 24-48 Hours Post-Injury |                 | Asymptomatic    |             |
|--------|---------------------|---------------------|------------------------------|-----------------|-------------------------|-----------------|-----------------|-------------|
|        |                     |                     | Mean Difference <sup>a</sup> | <i>P</i>        | Mean Difference         | <i>P</i>        | Mean Difference | <i>P</i>    |
| GFAP   | Concussed vs.       | Contact Control     | 0.419                        | <b>&lt;.001</b> | 0.191                   | <b>&lt;.001</b> | 0.100           | .105        |
|        |                     | Non-Contact Control | 0.378                        | <b>&lt;.001</b> | 0.177                   | <b>.003</b>     | 0.040           | >.999       |
|        | Contact Control vs. | Non-Contact Control | -0.041                       | >.999           | -0.014                  | >.999           | -0.060          | .909        |
| UCH-L1 | Concussed vs.       | Contact Control     | 0.577                        | <b>&lt;.001</b> | 0.023                   | >.999           | -0.200          | .375        |
|        |                     | Non-Contact Control | 0.463                        | <b>.010</b>     | -0.034                  | >.999           | -0.373          | <b>.027</b> |
|        | Contact Control vs. | Non-Contact Control | -0.114                       | >.999           | -0.057                  | >.999           | -0.172          | .839        |
| NF-L   | Concussed vs.       | Contact Control     | 0.072                        | .628            | 0.012                   | >.999           | 0.023           | >.999       |
|        |                     | Non-Contact Control | 0.039                        | >.999           | -0.007                  | >.999           | -0.026          | >.999       |
|        | Contact Control vs. | Non-Contact Control | -0.033                       | >.999           | -0.019                  | >.999           | -0.048          | >.999       |
| tau    | Concussed vs.       | Contact Control     | 0.230                        | <b>.026</b>     | -0.285                  | <b>.001</b>     | -0.153          | .139        |
|        |                     | Non-Contact Control | 0.266                        | <b>.016</b>     | -0.217                  | <b>.038</b>     | -0.037          | >.999       |
|        | Contact Control vs. | Non-Contact Control | 0.036                        | >.999           | 0.067                   | >.999           | 0.116           | .665        |

<sup>a</sup>Mean differences of natural log-transformed biomarker values.

Results are reported only for comparisons with significant simple main effects. Mean differences All *P*-values are corrected for multiple comparisons (Bonferroni).



**eTable 7.** Area Under the Curve (AUC) Summaries for Biomarkers SAC and BESS at Acute Post-Injury and 24-48 Hours Post-Injury Time Points

|                         |                  | Concussed vs. Contact Controls |              |                       | Concussed vs. Non-Contact Controls |              |                 |
|-------------------------|------------------|--------------------------------|--------------|-----------------------|------------------------------------|--------------|-----------------|
|                         |                  | AUC                            | 95% CI       | <i>P</i> <sup>a</sup> | AUC                                | 95% CI       | <i>P</i>        |
| Acute Post-injury       | GFAP             | 0.68                           | [0.61, 0.75] | <b>&lt;.001</b>       | 0.67                               | [0.60, 0.75] | <b>&lt;.001</b> |
|                         | UCH-L1           | 0.66                           | [0.59, 0.74] | <b>&lt;.001</b>       | 0.64                               | [0.56, 0.73] | <b>.002</b>     |
|                         | NF-L             | 0.56                           | [0.48, 0.63] | .152                  | 0.53                               | [0.45, 0.61] | .521            |
|                         | tau              | 0.55                           | [0.48, 0.63] | .196                  | 0.60                               | [0.52, 0.68] | <b>.021</b>     |
|                         | GFAP+UCH-L1      | 0.71                           | [0.64, 0.78] | <b>&lt;.001</b>       | 0.70                               | [0.62, 0.78] | <b>&lt;.001</b> |
|                         | All Biomarkers   | 0.72                           | [0.65, 0.79] | <b>&lt;.001</b>       | 0.72                               | [0.65, 0.80] | <b>&lt;.001</b> |
|                         | SAC              | 0.65                           | [0.59, 0.71] | <b>&lt;.001</b>       | 0.65                               | [0.59, 0.71] | <b>&lt;.001</b> |
|                         | BESS             | 0.68                           | [0.62, 0.74] | <b>&lt;.001</b>       | 0.64                               | [0.57, 0.71] | <b>&lt;.001</b> |
|                         | SCAT3            | 0.95                           | [0.92, 0.97] | <b>&lt;.001</b>       | 0.94                               | [0.91, 0.97] | <b>&lt;.001</b> |
|                         | SCAT3+Biomarkers | 0.97                           | [0.94, 0.99] | <b>&lt;.001</b>       | 0.96                               | [0.93, 0.99] | <b>&lt;.001</b> |
| 24-48 Hours Post-injury | GFAP             | 0.57                           | [0.51, 0.63] | <b>.033</b>           | 0.57                               | [0.50, 0.64] | <b>.047</b>     |
|                         | UCH-L1           | 0.51                           | [0.44, 0.59] | .709                  | 0.51                               | [0.44, 0.59] | .756            |
|                         | NF-L             | 0.49                           | [0.43, 0.56] | .81                   | 0.47                               | [0.40, 0.54] | .371            |
|                         | tau              | 0.36                           | [0.30, 0.43] | <b>&lt;.001</b>       | 0.40                               | [0.33, 0.47] | <b>.006</b>     |
|                         | GFAP+UCH-L1      | 0.55                           | [0.48, 0.62] | .165                  | 0.58                               | [0.50, 0.65] | .057            |
|                         | All Biomarkers   | 0.65                           | [0.57, 0.72] | <b>&lt;.001</b>       | 0.65                               | [0.57, 0.72] | <b>&lt;.001</b> |
|                         | SAC              | 0.60                           | [0.54, 0.66] | <b>.001</b>           | 0.58                               | [0.52, 0.65] | <b>.019</b>     |
|                         | BESS             | 0.67                           | [0.61, 0.73] | <b>&lt;.001</b>       | 0.61                               | [0.54, 0.67] | <b>.002</b>     |
|                         | SCAT3            | 0.91                           | [0.88, 0.95] | <b>&lt;.001</b>       | 0.93                               | [0.90, 0.96] | <b>&lt;.001</b> |
|                         | SCAT3+Biomarkers | 0.91                           | [0.88, 0.95] | <b>&lt;.001</b>       | 0.93                               | [0.90, 0.96] | <b>&lt;.001</b> |

GFAP: glial fibrillary acidic protein; UCH-L1: ubiquitin C-terminal hydrolase-L1; NF-L: neurofilament light; SCAT3=Sport Concussion Assessment Tool – 3<sup>rd</sup> Edition; SAC: Standardized Assessment of Concussion; BESS: Balance Error Scoring System; BSI: CI: confidence interval; AUC: area under the curve.

<sup>a</sup>*P*-values represent significance of area under the curve (AUC) from the null (AUC = 0.5)

**eTable 8. Biomarker Characteristics for Concussed Athletes With or Without Loss of Consciousness or Post-Traumatic Amnesia at All Time Points**

|                         |        | LOC/PTA+ |        |        |        |                 | LOC/PTA- |       |        |        |                 |
|-------------------------|--------|----------|--------|--------|--------|-----------------|----------|-------|--------|--------|-----------------|
|                         |        | n        | Mean   | SD     | Median | IQR [Q1-Q3]     | n        | Mean  | SD     | Median | IQR             |
| Baseline                | GFAP   | 54       | 64.44  | 23.22  | 59.54  | [45.04, 80.33]  | 189      | 61.06 | 25.42  | 56.53  | [43.92, 72.81]  |
|                         | UCH-L1 | 47       | 12.20  | 10.81  | 9.03   | [4.11, 15.29]   | 147      | 21.02 | 28.81  | 11.68  | [5.42, 29.09]   |
|                         | NF-L   | 54       | 6.56   | 2.95   | 5.67   | [4.68, 7.83]    | 189      | 6.56  | 3.42   | 5.89   | [4.29, 7.76]    |
|                         | tau    | 54       | 0.94   | 0.52   | 0.86   | [0.60, 1.13]    | 186      | 1.07  | 0.72   | 0.88   | [0.61, 1.28]    |
| Acute Post-injury       | GFAP   | 26       | 215.20 | 197.40 | 122.05 | [71.71, 311.21] | 74       | 91.92 | 69.85  | 71.03  | [52.39, 105.49] |
|                         | UCH-L1 | 25       | 34.45  | 25.06  | 31.22  | [11.36, 57.07]  | 67       | 25.10 | 22.88  | 18.81  | [8.26, 34.17]   |
|                         | NF-L   | 26       | 8.25   | 4.24   | 6.52   | [5.41, 9.55]    | 74       | 6.61  | 2.82   | 6.08   | [4.56, 7.85]    |
|                         | tau    | 26       | 1.54   | 1.31   | 1.32   | [0.68, 1.76]    | 74       | 1.27  | 1.31   | 0.96   | [0.68, 1.53]    |
| 24-48 Hours Post-injury | GFAP   | 37       | 138.19 | 178.79 | 80.97  | [58.84, 126.11] | 146      | 91.26 | 212.67 | 63.5   | [48.84, 91.84]  |
|                         | UCH-L1 | 31       | 17.61  | 14.33  | 11.49  | [5.90, 30.50]   | 120      | 15.37 | 17.02  | 9.85   | [5.42, 19.39]   |
|                         | NF-L   | 37       | 7.51   | 3.81   | 6.13   | [5.19, 9.33]    | 146      | 6.27  | 3.02   | 5.47   | [4.34, 7.58]    |
|                         | tau    | 37       | 0.72   | 0.38   | 0.64   | [0.44, 0.94]    | 141      | 0.79  | 0.68   | 0.63   | [0.39, 0.97]    |
| Asymptomatic            | GFAP   | 53       | 85.72  | 55.30  | 74.34  | [57.50, 96.46]  | 178      | 68.77 | 36.12  | 60.58  | [46.48, 82.54]  |
|                         | UCH-L1 | 42       | 13.16  | 12.41  | 9.30   | [4.19, 17.03]   | 134      | 14.83 | 25.14  | 9.36   | [3.86, 17.99]   |
|                         | NF-L   | 53       | 8.82   | 5.47   | 7.39   | [5.33, 11.03]   | 178      | 6.53  | 6.08   | 5.73   | [4.16, 7.55]    |
|                         | tau    | 52       | 0.93   | 0.77   | 0.77   | [0.48, 1.06]    | 175      | 0.98  | 0.95   | 0.75   | [0.47, 1.18]    |
| 7 Days Post-RTP         | GFAP   | 42       | 78.35  | 33.70  | 67.02  | [53.51, 99.31]  | 159      | 63.92 | 21.75  | 60.37  | [47.99, 76.73]  |
|                         | UCH-L1 | 33       | 16.72  | 19.69  | 9.99   | [4.05, 23.16]   | 127      | 15.29 | 13.15  | 10.75  | [5.58, 23.28]   |
|                         | NF-L   | 42       | 12.98  | 11.34  | 8.64   | [5.26, 18.20]   | 159      | 6.20  | 2.62   | 5.80   | [4.06, 7.58]    |
|                         | tau    | 42       | 1.13   | 1.04   | 0.81   | [0.52, 1.24]    | 158      | 1.32  | 2.68   | 0.93   | [0.55, 1.32]    |

LOC: loss of consciousness; PTA: post-traumatic amnesia; GFAP: glial fibrillary acidic protein; UCH-L1: ubiquitin C-terminal hydrolase-L1; NF-L: neurofilament light; SD: standard deviation; IQR: interquartile range; RTP: return to play

Units represent pg/mL for all biomarkers. Biomarker characteristics for contact and non-contact control athletes are reported in eTable 4.

GFAP: limit of detection (LOD) = 0.221 pg/mL, lower limit of quantification (LLOQ) = 0.467 pg/mL, upper limit of quantification (ULOQ) = 850 pg/mL; UCH-L1: LOD = 1.74 pg/mL, LLOQ = 5.45 pg/mL, ULOQ = 8855 pg/mL; NF-L: LOD = 0.104 pg/mL, LLOQ = 0.241 pg/mL, ULOQ = 429 pg/mL; tau: LOD = 0.024 pg/mL, LLOQ = 0.053 pg/mL, ULOQ = 84.9 pg/mL

**eTable 9.** Within-Subjects Comparisons of Biomarkers in Athletes With or Without Loss of Consciousness or Post-Traumatic Amnesia

|        | Time point Comparison       | LOC/PTA+                     |          | LOC/PTA-        |          |                 |
|--------|-----------------------------|------------------------------|----------|-----------------|----------|-----------------|
|        |                             | Mean Difference <sup>a</sup> | <i>P</i> | Mean Difference | <i>P</i> |                 |
| GFAP   | Baseline vs.                | Acute Post-Injury            | -0.803   | <b>&lt;.001</b> | -0.302   | <b>&lt;.001</b> |
|        |                             | 24-48 Hours Post-Injury      | -0.481   | <b>&lt;.001</b> | -0.195   | <b>&lt;.001</b> |
|        |                             | Asymptomatic                 | -0.212   | <b>&lt;.001</b> | -0.098   | <b>.003</b>     |
|        |                             | 7 Days Post-RTP              | -0.120   | .242            | -0.082   | <b>.032</b>     |
|        | Acute Post-Injury vs.       | 24-48 Hours Post-Injury      | 0.322    | <b>&lt;.001</b> | 0.108    | <b>.047</b>     |
|        |                             | Asymptomatic                 | 0.592    | <b>&lt;.001</b> | 0.205    | <b>&lt;.001</b> |
|        |                             | 7 Days Post-RTP              | 0.684    | <b>&lt;.001</b> | 0.221    | <b>&lt;.001</b> |
|        | 24-48 Hours Post-Injury vs. | Asymptomatic                 | 0.269    | <b>&lt;.001</b> | 0.097    | <b>.009</b>     |
|        |                             | 7 Days Post-RTP              | 0.361    | <b>&lt;.001</b> | 0.113    | <b>.002</b>     |
|        | Asymptomatic vs.            | 7 Days Post-RTP              | 0.092    | .825            | 0.016    | >.999           |
| UCH-L1 | Baseline vs.                | Acute Post-Injury            | -0.838   | <b>&lt;.001</b> | -0.309   | .082            |
|        |                             | 24-48 Hours Post-Injury      | -0.246   | >.999           | 0.244    | .108            |
|        |                             | Asymptomatic                 | -0.058   | >.999           | 0.450    | <b>&lt;.001</b> |
|        |                             | 7 Days Post-RTP              | -0.011   | >.999           | 0.121    | >.999           |
|        | Acute Post-Injury vs.       | 24-48 Hours Post-Injury      | 0.592    | .054            | 0.553    | <b>&lt;.001</b> |
|        |                             | Asymptomatic                 | 0.779    | <b>.001</b>     | 0.760    | <b>&lt;.001</b> |
|        |                             | 7 Days Post-RTP              | 0.827    | <b>.001</b>     | 0.430    | <b>.003</b>     |
|        | 24-48 Hours Post-Injury vs. | Asymptomatic                 | 0.187    | >.999           | 0.206    | .339            |
|        |                             | 7 Days Post-RTP              | 0.235    | >.999           | -0.123   | >.999           |
|        | Asymptomatic vs.            | 7 Days Post-RTP              | 0.048    | <b>&gt;.999</b> | -0.329   | <b>.006</b>     |
| NF-L   | Baseline vs.                | Acute Post-Injury            | -0.171   | .199            | -0.039   | >.999           |
|        |                             | 24-48 Hours Post-Injury      | -0.102   | >.999           | 0.006    | >.999           |
|        |                             | Asymptomatic                 | -0.195   | <b>.006</b>     | 0.032    | >.999           |
|        |                             | 7 Days Post-RTP              | -0.435   | <b>&lt;.001</b> | 0.001    | >.999           |
|        | Acute Post-Injury vs.       | 24-48 Hours Post-Injury      | 0.069    | >.999           | 0.045    | >.999           |
|        |                             | Asymptomatic                 | -0.024   | >.999           | 0.071    | .963            |
|        |                             | 7 Days Post-RTP              | -0.264   | <b>.006</b>     | 0.039    | >.999           |
|        | 24-48 Hours Post-Injury vs. | Asymptomatic                 | -0.093   | >.999           | 0.026    | >.999           |
|        |                             | 7 Days Post-RTP              | -0.333   | <b>&lt;.001</b> | -0.005   | >.999           |
|        | Asymptomatic vs.            | 7 Days Post-RTP              | -0.240   | <b>.001</b>     | -0.032   | >.999           |
| tau    | Baseline vs.                | Acute Post-Injury            | -0.345   | .054            | -0.179   | .128            |
|        |                             | 24-48 Hours Post-Injury      | 0.272    | .122            | 0.334    | <b>&lt;.001</b> |
|        |                             | Asymptomatic                 | 0.160    | .986            | 0.190    | <b>.004</b>     |
|        |                             | 7 Days Post-RTP              | -0.045   | >.999           | -0.008   | >.999           |
|        | Acute Post-Injury vs.       | 24-48 Hours Post-Injury      | 0.618    | <b>&lt;.001</b> | 0.513    | <b>&lt;.001</b> |
|        |                             | Asymptomatic                 | 0.506    | <b>&lt;.001</b> | 0.370    | <b>&lt;.001</b> |
|        |                             | 7 Days Post-RTP              | 0.301    | .211            | 0.171    | .206            |
|        | 24-48 Hours Post-Injury vs. | Asymptomatic                 | -0.112   | >.999           | -0.143   | .138            |
|        |                             | 7 Days Post-RTP              | -0.317   | .067            | -0.342   | <b>&lt;.001</b> |
|        | Asymptomatic vs.            | 7 Days Post-RTP              | -0.205   | .504            | -0.199   | <b>.004</b>     |

<sup>a</sup>Mean differences of natural log-transformed biomarker values.

Results are reported only for comparisons with significant simple main effects. All *P*-values are corrected for multiple comparisons (Bonferroni).

**eTable 10.** Between-Subjects Comparisons of Biomarkers in Athletes With or Without Loss of Consciousness or Post-Traumatic Amnesia, Contact Control, and Non-Contact Control Athletes

|        | Group Comparison    |                     | Acute Post-Injury            |                 | 24-48 Hours Post-Injury |                 | Asymptomatic    |                 | 7 Days Post-RTP |                 |
|--------|---------------------|---------------------|------------------------------|-----------------|-------------------------|-----------------|-----------------|-----------------|-----------------|-----------------|
|        |                     |                     | Mean Difference <sup>a</sup> | <i>P</i>        | Mean Difference         | <i>P</i>        | Mean Difference | <i>P</i>        | Mean Difference | <i>P</i>        |
| GFAP   | LOC/PTA+ vs.        | LOC/PTA-            | 0.583                        | <b>&lt;.001</b> | 0.368                   | <b>&lt;.001</b> | 0.196           | <b>.018</b>     | NS              |                 |
|        |                     | Contact Control     | 0.857                        | <b>&lt;.001</b> | 0.482                   | <b>&lt;.001</b> | 0.253           | <b>.002</b>     |                 |                 |
|        |                     | Non-Contact Control | 0.816                        | <b>&lt;.001</b> | 0.468                   | <b>&lt;.001</b> | 0.193           | <b>.048</b>     |                 |                 |
|        | LOC/PTA- vs.        | Contact Control     | 0.274                        | <b>&lt;.001</b> | 0.113                   | .134            | 0.057           | >.999           |                 |                 |
|        |                     | Non-Contact Control | 0.233                        | <b>.001</b>     | 0.099                   | .405            | -0.003          | >.999           |                 |                 |
|        | Contact Control vs. | Non-Contact Control | -0.041                       | >.999           | -0.014                  | >.999           | -0.060          | >.999           |                 |                 |
| UCH-L1 | LOC/PTA+ vs.        | LOC/PTA-            | 0.207                        | >.999           | NS                      |                 | 0.188           | >.999           | NS              |                 |
|        |                     | Contact Control     | 0.725                        | <b>.005</b>     |                         |                 | -0.061          | >.999           |                 |                 |
|        |                     | Non-Contact Control | 0.611                        | <b>.044</b>     |                         |                 | -0.234          | >.999           |                 |                 |
|        | LOC/PTA- vs.        | Contact Control     | 0.518                        | <b>.005</b>     |                         |                 | -0.249          | .418            |                 |                 |
|        |                     | Non-Contact Control | 0.404                        | .094            |                         |                 | -0.422          | <b>.027</b>     |                 |                 |
|        | Contact Control vs. | Non-Contact Control | -0.114                       | >.999           |                         |                 | -0.173          | >.999           |                 |                 |
| NF-L   | LOC/PTA+ vs.        | LOC/PTA-            | NS                           |                 | NS                      |                 | 0.290           | <b>&lt;.001</b> | 0.498           | <b>&lt;.001</b> |
|        |                     | Contact Control     |                              |                 |                         |                 | 0.248           | <b>.007</b>     | 0.481           | <b>&lt;.001</b> |
|        |                     | Non-Contact Control |                              |                 |                         |                 | 0.200           | .075            | 0.448           | <b>&lt;.001</b> |
|        | LOC/PTA- vs.        | Contact Control     |                              |                 |                         |                 | -0.042          | >.999           | -0.017          | >.999           |
|        |                     | Non-Contact Control |                              |                 |                         |                 | -0.090          | .748            | -0.050          | >.999           |
|        | Contact Control vs. | Non-Contact Control |                              |                 |                         |                 | -0.048          | >.999           | -0.034          | >.999           |
| tau    | LOC/PTA+ vs.        | LOC/PTA-            | 0.089                        | >.999           | -0.016                  | >.999           | NS              |                 | NS              |                 |
|        |                     | Contact Control     | 0.294                        | .200            | -0.297                  | .104            |                 |                 |                 |                 |
|        |                     | Non-Contact Control | 0.330                        | .128            | -0.230                  | .460            |                 |                 |                 |                 |
|        | LOC/PTA- vs.        | Contact Control     | 0.206                        | .179            | -0.281                  | <b>.005</b>     |                 |                 |                 |                 |
|        |                     | Non-Contact Control | 0.241                        | .107            | -0.214                  | .112            |                 |                 |                 |                 |
|        | Contact Control vs. | Non-Contact Control | 0.036                        | >.999           | 0.067                   | >.999           |                 |                 |                 |                 |

<sup>a</sup>Mean differences of natural log-transformed biomarker values.

NS, Non-significant simple main effect.

Results are reported only for comparisons with significant simple main effects. All *P*-values are corrected for multiple comparisons (Bonferroni).

**eTable 11.** Subgroup Area Under the Curve (AUC) for Biomarkers SAC and BESS at Acute Post-Injury and 24-48 Hours Post-Injury Time Points

|                         |                | LOC/PTA+ vs. LOC/PTA- |              |                       | LOC/PTA+ vs. Contact Control |              |                 | LOC/PTA vs. Non-Contact Control |              |                 |
|-------------------------|----------------|-----------------------|--------------|-----------------------|------------------------------|--------------|-----------------|---------------------------------|--------------|-----------------|
|                         |                | AUC                   | 95% CI       | <i>P</i> <sup>a</sup> | AUC                          | 95% CI       | <i>P</i>        | AUC                             | 95% CI       | <i>P</i>        |
| Acute Post-injury       | GFAP           | 0.71                  | [0.59, 0.83] | <b>.002</b>           | 0.81                         | [0.71, 0.91] | <b>&lt;.001</b> | 0.81                            | [0.71, 0.92] | <b>&lt;.001</b> |
|                         | UCH-L1         | 0.63                  | [0.50, 0.76] | .062                  | 0.74                         | [0.63, 0.85] | <b>&lt;.001</b> | 0.73                            | [0.61, 0.85] | <b>.001</b>     |
|                         | NF-L           | 0.60                  | [0.48, 0.73] | .120                  | 0.64                         | [0.53, 0.74] | .029            | 0.61                            | [0.49, 0.73] | .083            |
|                         | tau            | 0.57                  | [0.44, 0.71] | .264                  | 0.59                         | [0.47, 0.72] | .132            | 0.64                            | [0.51, 0.77] | <b>.030</b>     |
|                         | GFAP+UCH-L1    | 0.73                  | [0.61, 0.85] | <b>.001</b>           | 0.84                         | [0.74, 0.94] | <b>&lt;.001</b> | 0.84                            | [0.73, 0.94] | <b>&lt;.001</b> |
|                         | All Biomarkers | 0.73                  | [0.61, 0.85] | <b>.001</b>           | 0.85                         | [0.75, 0.94] | <b>&lt;.001</b> | 0.83                            | [0.73, 0.94] | <b>&lt;.001</b> |
|                         | SAC            | 0.65                  | [0.55, 0.75] | <b>.003</b>           | 0.75                         | [0.66, 0.84] | <b>&lt;.001</b> | 0.75                            | [0.65, 0.84] | <b>&lt;.001</b> |
|                         | BESS           | 0.53                  | [0.42, 0.63] | .653                  | 0.69                         | [0.59, 0.79] | <b>&lt;.001</b> | 0.66                            | [0.55, 0.76] | <b>.005</b>     |
|                         | SCAT3          | 0.54                  | [0.45, 0.64] | .395                  | 0.94                         | [0.90-0.99]  | <b>&lt;.001</b> | 0.94                            | [0.89, 0.99] | <b>&lt;.001</b> |
| 24-48 Hours Post-injury | GFAP           | 0.66                  | [0.56, 0.76] | <b>.003</b>           | 0.70                         | [0.61, 0.80] | <b>&lt;.001</b> | 0.70                            | [0.60, 0.80] | <b>&lt;.001</b> |
|                         | UCH-L1         | 0.56                  | [0.44, 0.68] | .296                  | 0.56                         | [0.44, 0.68] | .285            | 0.57                            | [0.44, 0.70] | .275            |
|                         | NF-L           | 0.60                  | [0.49, 0.70] | .065                  | 0.57                         | [0.47, 0.68] | .175            | 0.55                            | [0.44, 0.66] | .351            |
|                         | tau            | 0.52                  | [0.42, 0.62] | .704                  | 0.36                         | [0.26, 0.45] | <b>.007</b>     | 0.42                            | [0.30, 0.51] | .089            |
|                         | GFAP+UCH-L1    | 0.66                  | [0.55, 0.77] | <b>.006</b>           | 0.69                         | [0.57, 0.80] | <b>.002</b>     | 0.71                            | [0.60, 0.82] | <b>.001</b>     |
|                         | All Biomarkers | 0.66                  | [0.56, 0.77] | <b>.006</b>           | 0.70                         | [0.59, 0.81] | <b>.001</b>     | 0.72                            | [0.60, 0.83] | <b>&lt;.001</b> |
|                         | SAC            | 0.48                  | [0.38, 0.59] | .739                  | 0.58                         | [0.48, 0.69] | .114            | 0.56                            | [0.45, 0.67] | .240            |
|                         | BESS           | 0.55                  | [0.46, 0.65] | .273                  | 0.71                         | [0.62, 0.80] | <b>&lt;.001</b> | 0.65                            | [0.55, 0.75] | <b>.005</b>     |
|                         | SCAT3          | 0.50                  | [0.41, 0.59] | .969                  | 0.92                         | [0.88, 0.99] | <b>&lt;.001</b> | 0.95                            | [0.90, 1.00] | <b>&lt;.001</b> |

LOC: loss of consciousness; PTA: posttraumatic amnesia; GFAP: glial fibrillary acidic protein; UCH-L1: ubiquitin C-terminal hydrolase-L1; NF-L: neurofilament light; SCAT3=Sport Concussion Assessment Tool – 3<sup>rd</sup> Edition; SAC: Standardized Assessment of Concussion; BESS: Balance Error Scoring System; BSI: CI: confidence interval; AUC: area under the curve.

<sup>a</sup>*P*-values represent significance of area under the curve (AUC) from the null (AUC = 0.5)
